# Supplementary material
Source: MDPI journal article supplement (https://www.mdpi.com/2312-7481/7/11/150)
Supplement: s1 [file s1]

# Supplementary Materials: Counterintuitive Single-Molecule Magnet Behaviour in Two Polymorphs of One-Dimensional Compounds Involving Chiral BINOL-Derived Bisphosphate Ligands

Carlo Andrea Mattei, Bertrand Lefevre, Vincent Dorcet, Gilles Argouarch, Olivier Cador, Claudia Lalli and Fabrice Pointillart \*

ISCR (Institut des Sciences Chimiques de Rennes)—UMR 6226, CNRS, Univ. Rennes, F-35042 Rennes, France; carloandrea22@libero.it (C.A.M.); bertrand.lefeuvre@univ-rennes1.fr (B.L.); vincent.dorcet@univ-rennes1.fr (V.D.); gilles.argouarch@univ-rennes1.fr (G.A.); olivier.cador@univ-rennes1.fr (O.C.); claudia.lalli@univ-rennes1.fr (C.L.)

\* Correspondence: fabrice.pointillart@univ-rennes1.fr

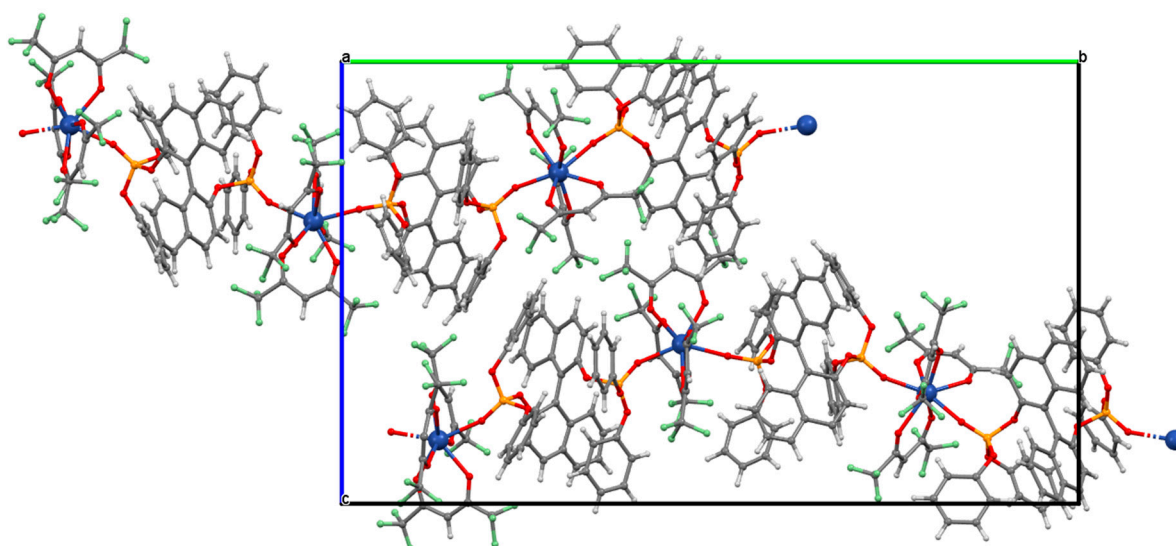

**Figure S1.** Fragments of two chains for the complex (S)-1 (view along the axis *a*). (Dy = blue, O = red, C = dark grey, H = light grey, P = orange, F = green).

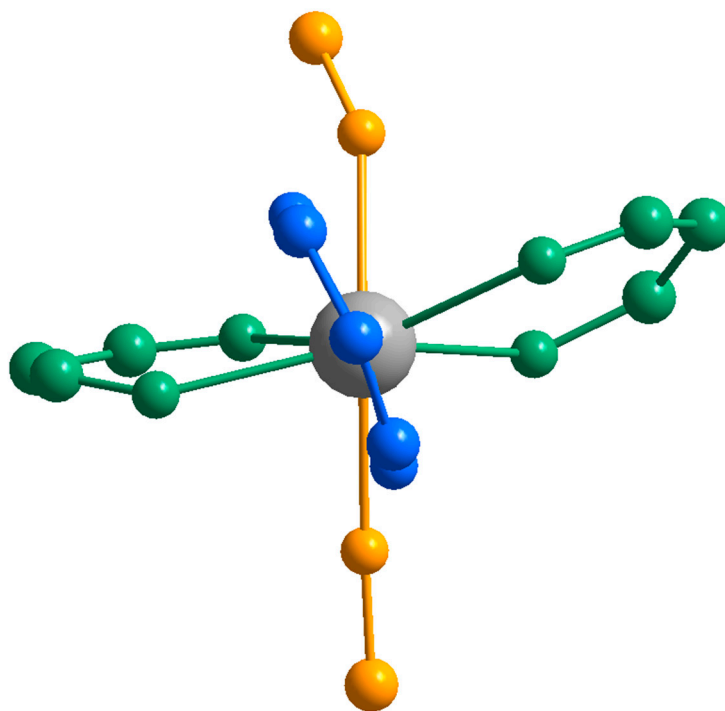

**Figure S2.** Representative coordination sphere of the  $\text{Dy}^{\text{III}}$  ions in both **1** and **2**.  $\text{P}=\text{O}$ , the two face-to-face hfac<sup>−</sup> and the third hfac ligands are drawn in orange, green and blue, respectively. .

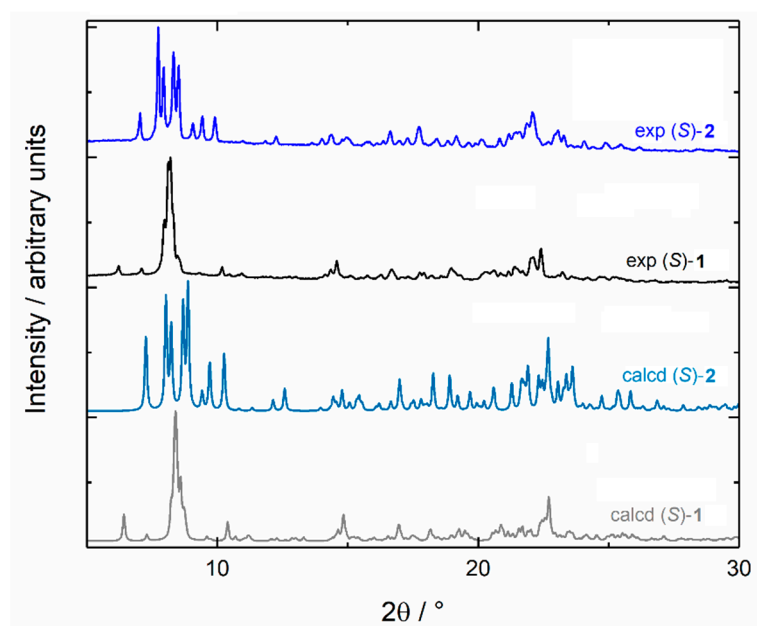

**Figure S3.** Superposition of experimental powder X-ray diffraction patterns from (S)-**2** and (S)-**1** measured at 300 K and simulated from (S)-**2** [1] and (S)-**1** single-crystal data obtained at 150 K.

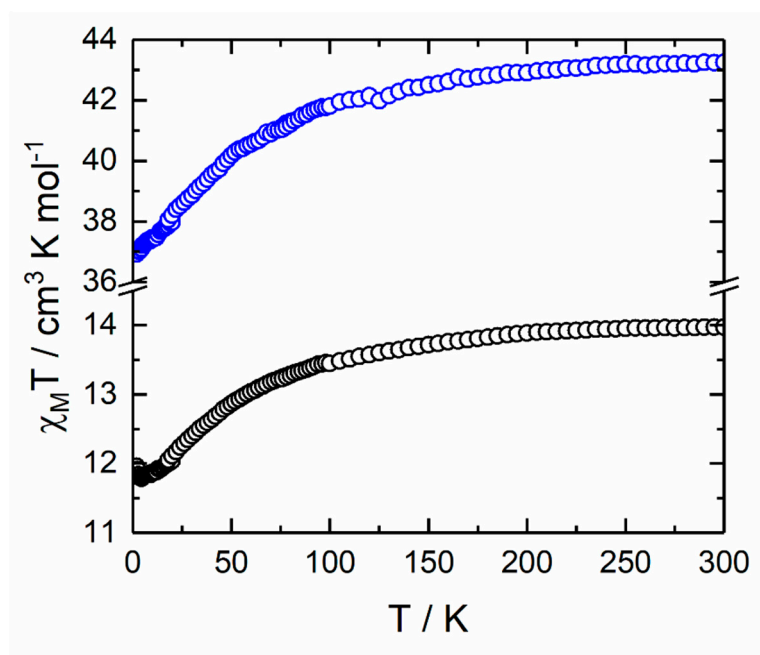

**Figure S4.** Temperature dependence of the  $\chi_M T$  products for (S)-1 (blue open circles) (given for the three crystallographically independent  $\text{Dy}^{\text{III}}$  centers) and (S)-2 [1] (black open circles) in the temperature range of 2–300 K.

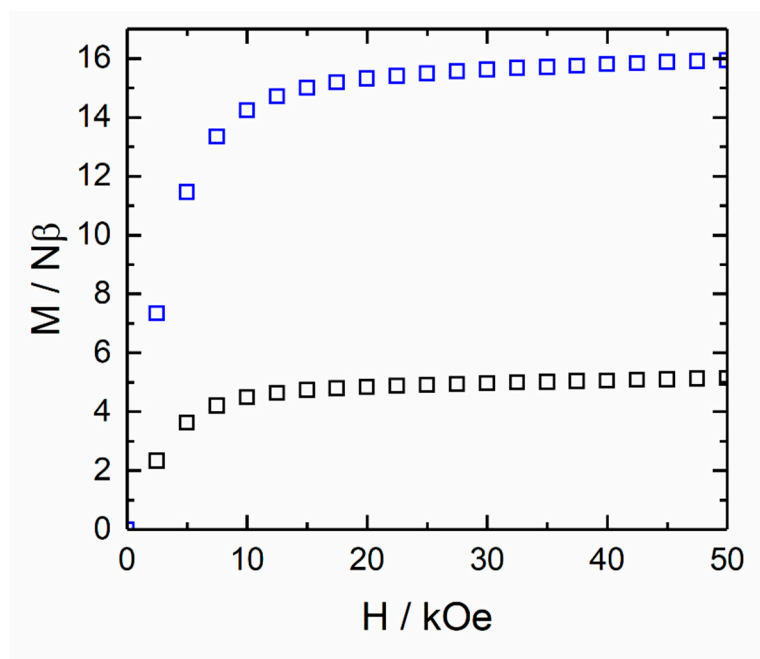

**Figure S5.** Field variation of the magnetization at 2 K for (S)-1 (given for the three crystallographically independent  $\text{Dy}^{\text{III}}$  centers) (blue open circles) and (S)-2 [1] (black open circles) in the field range of 0–5 T.

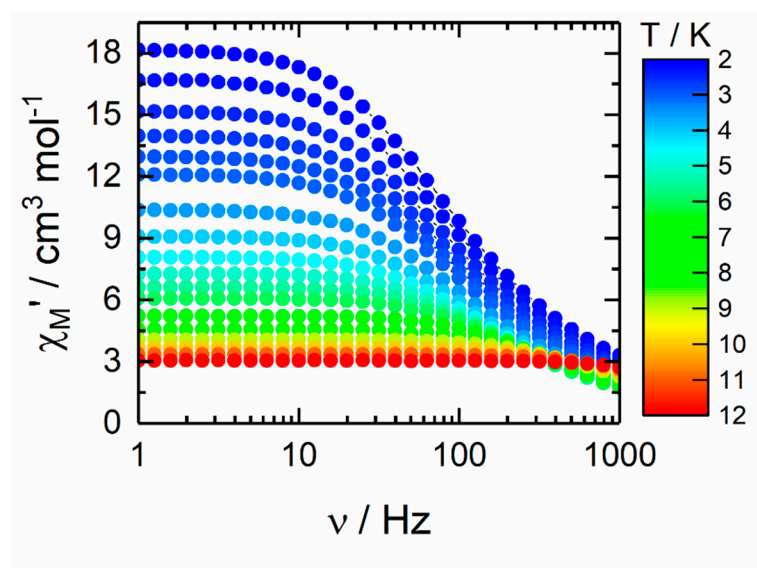

**Figure S6.** Frequency dependence of  $\chi_M''$  zero field for (S)-1 in the temperature range of 2–12 K.

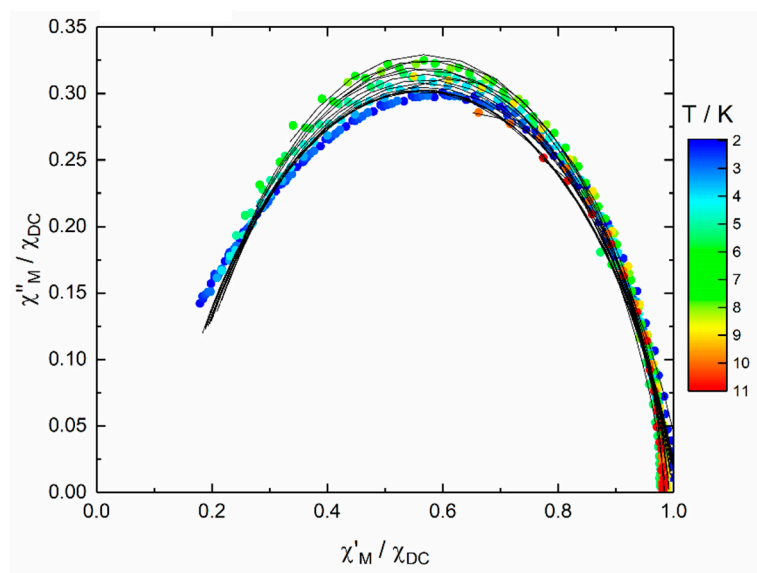

**Figure S7.** Normalized Argand plot of experimental (dots) and fit Debye (black lines) data for (S)-1 at zero applied field in the temperature range 2–11 K.

#### Extended Debye model.

$$\chi_M' = \chi_S + (\chi_T - \chi_S) \frac{1 + (\omega\tau)^{1-\alpha} \sin\left(\alpha \frac{\pi}{2}\right)}{1 + 2(\omega\tau)^{1-\alpha} \sin\left(\alpha \frac{\pi}{2}\right) + (\omega\tau)^{2-2\alpha}}$$

$$\chi_M'' = (\chi_T - \chi_S) \frac{(\omega\tau)^{1-\alpha} \cos\left(\alpha \frac{\pi}{2}\right)}{1 + 2(\omega\tau)^{1-\alpha} \sin\left(\alpha \frac{\pi}{2}\right) + (\omega\tau)^{2-2\alpha}}$$

With  $\chi_T$  the isothermal susceptibility,  $\chi_S$  the adiabatic susceptibility,  $\tau$  the relaxation time and  $\alpha$  an empiric parameter which describe the distribution of the relaxation time. For SMM with only one relaxation time,  $\alpha$  is close to zero. The extended Debye model was applied to fit simultaneously the experimental variations of  $\chi_M'$  and  $\chi_M''$  with the

frequency  $\nu$  of the oscillating field ( $\omega = 2\pi\nu$ ). Typically, only the temperatures for which a maximum on the  $\chi_M''$  vs.  $\nu$  curves, have been considered. The best fitted parameters  $\tau$ ,  $\alpha$ ,  $\chi_T$ ,  $\chi_S$  are listed in Tables S3–S5 with the coefficient of determination  $R^2$ .

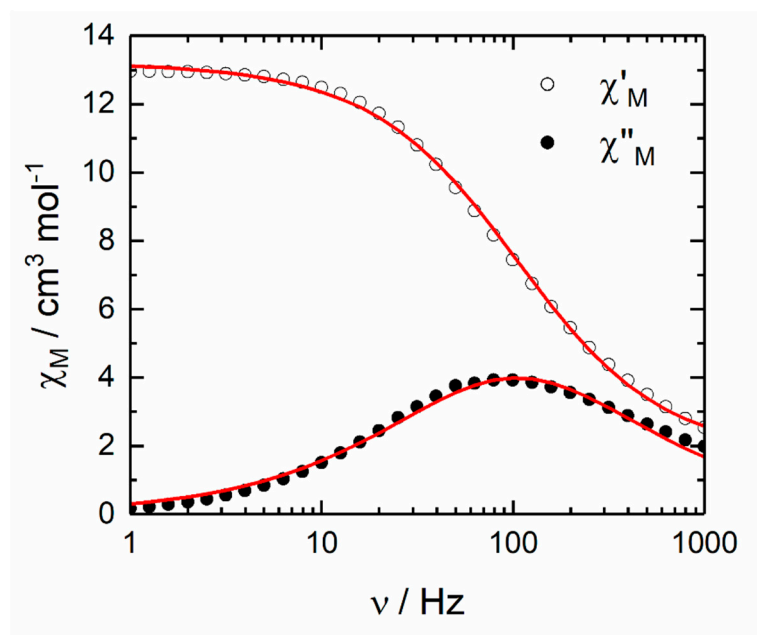

**Figure S8.** Frequency dependence of the in-phase ( $\chi_M'$ ) and out-of-phase ( $\chi_M''$ ) components of the ac susceptibility measured on powder at 2.8 K and 0 Oe with the best fitted curves (red lines) for (S)-1.

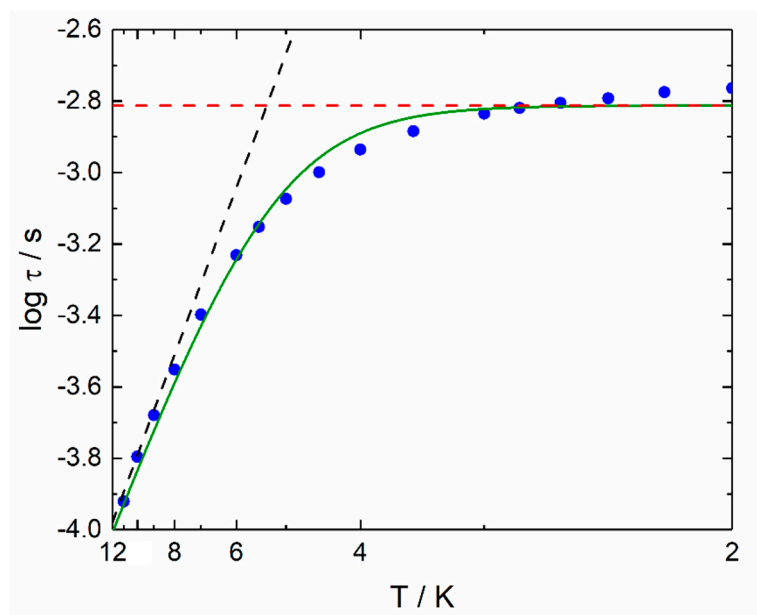

**Figure S9.** Temperature dependence of  $\tau$  (blue spots) for (S)-1 at zero applied magnetic field in the temperature range 2–11 K. The best fit curve is depicted as a full green line and the Orbach and QTM contributions are represented respectively in black dashed line and red dashed line.

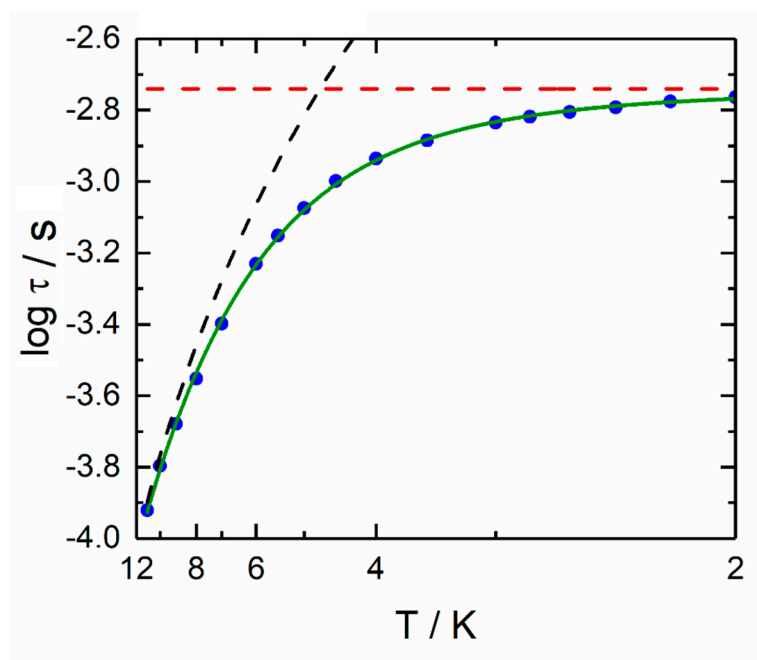

**Figure S10.** Temperature dependence of  $\tau$  (blue spots) for (S)-1 at zero applied magnetic field in the temperature range 2–11 K. The best fit curve is depicted as a full green line and the Raman and QTM contributions are represented respectively in black dashed line and red dashed line.

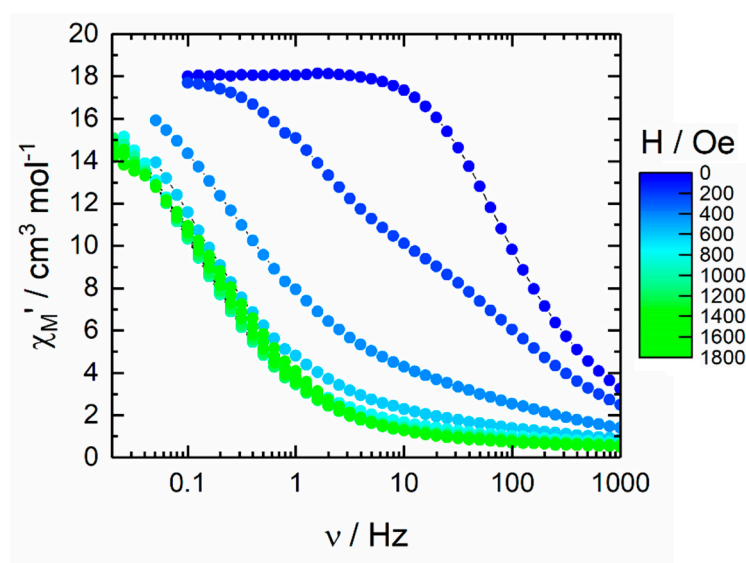

**Figure S11.** Frequency dependence of  $\chi_M'$  for 1 at 2 K in the field range of 0–1800 Oe.

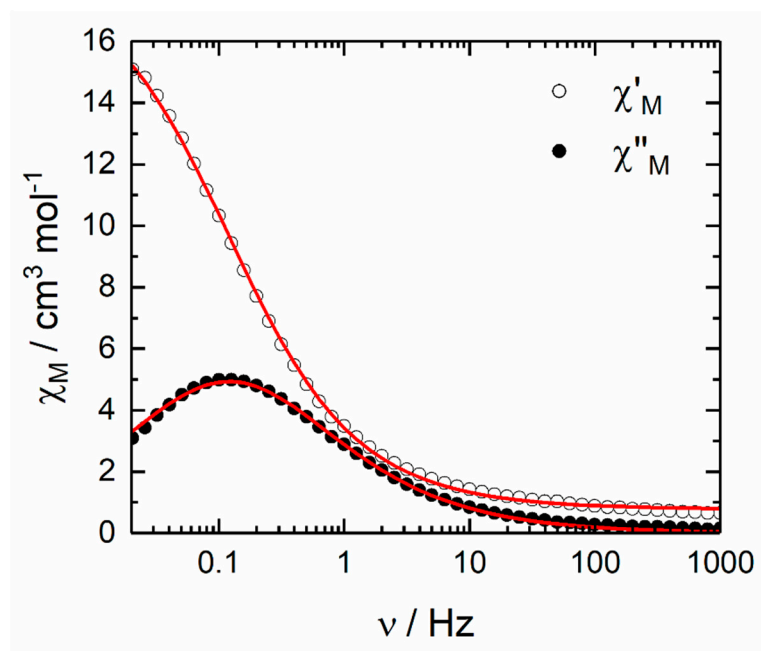

**Figure S12.** Frequency dependence of the in-phase ( $\chi'_M$ ) and out-of-phase ( $\chi''_M$ ) components of the ac susceptibility measured on powder at 2 K and 1000 Oe with the best fitted curves (red lines) for (S)-1.

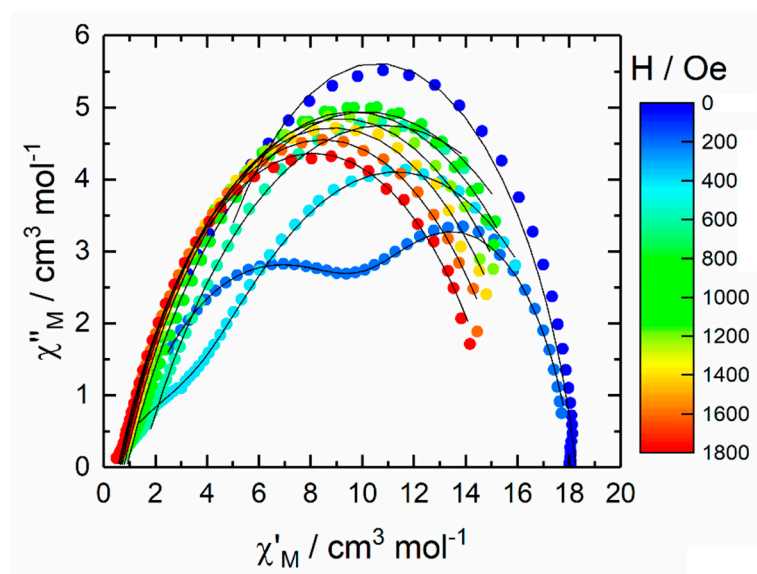

**Figure S13.** Argand plot of experimental (colored plots) and fit data (black lines) for 1 at 2 K in the field range 0-1800 Oe.

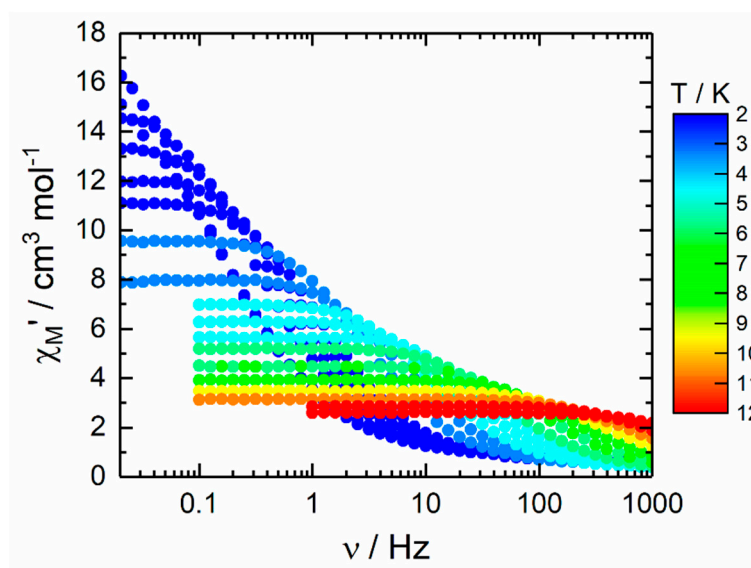

**Figure S14.** Frequency dependence of  $\chi_M''$  under an applied magnetic field of 1000 Oe for (S)-1 in the temperature range of 2–12 K.

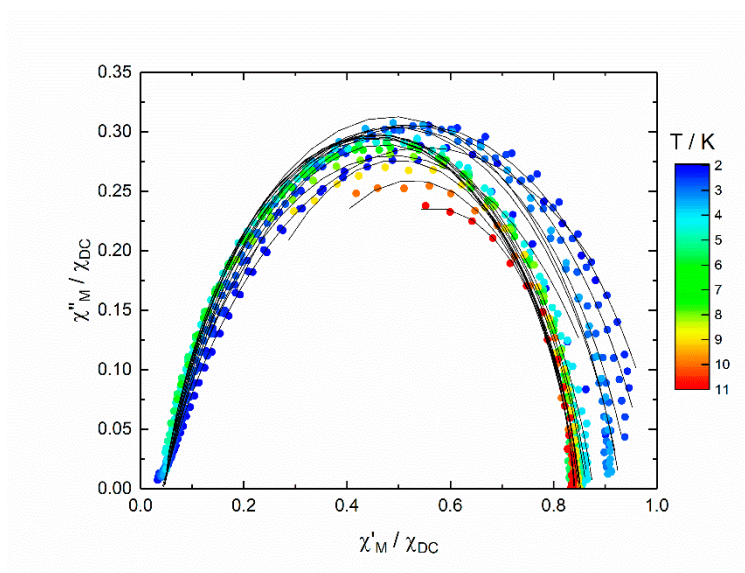

**Figure S15.** Normalized Argand plot of experimental (colored plots) and fit data (black lines) for **1** under an applied magnetic field of 1000 Oe in the temperature range 2–11 K.



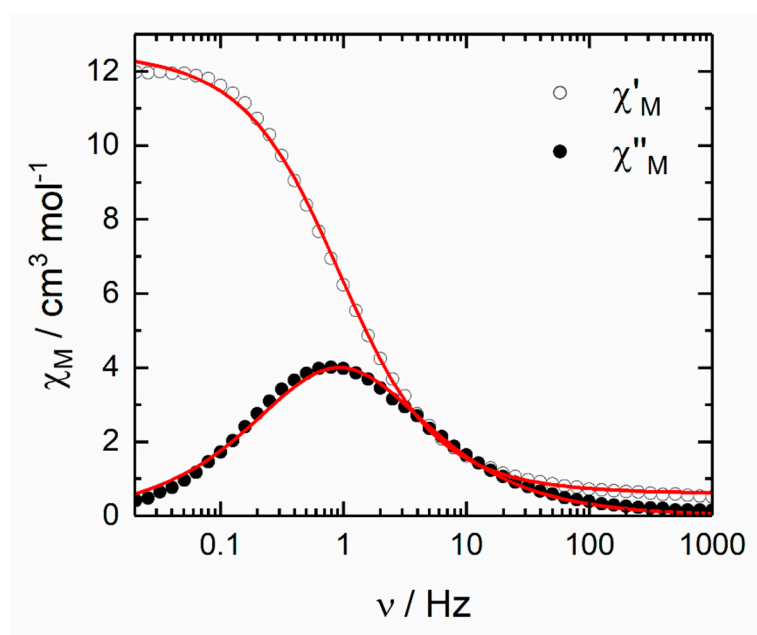

**Figure S16.** Frequency dependence of the in-phase ( $\chi'_M$ ) and out-of-phase ( $\chi''_M$ ) components of the ac susceptibility measured on powder at 2.8 K and 1000 Oe with the best fitted curves (red lines) for (S)-1.

**Table S1.** X-ray crystallographic data for **1**.

| Compound                               | <b>1</b>                                                                                         |
|----------------------------------------|--------------------------------------------------------------------------------------------------|
| Formula                                | C <sub>177</sub> H <sub>104</sub> Dy <sub>3</sub> F <sub>54</sub> O <sub>42</sub> P <sub>6</sub> |
| M / g.mol <sup>-1</sup>                | 4601.92                                                                                          |
| Crystal system                         | monoclinic                                                                                       |
| Space group                            | P 2 <sub>1</sub> (N° 4)                                                                          |
| Cell parameters                        | a = 12.1003(12) Å<br>b = 35.822(3) Å<br>c = 21.466(2) Å<br>β = 90.443(4)                         |
| Volume / Å <sup>3</sup>                | 9304.1(15)                                                                                       |
| Z                                      | 2                                                                                                |
| T / K                                  | 150 K                                                                                            |
| 2θ range / °                           | 4.24 ≤ 2θ ≤ 55.164                                                                               |
| ρ <sub>calc</sub> / g.cm <sup>-3</sup> | 1.643                                                                                            |
| μ / mm <sup>-1</sup>                   | 1.374                                                                                            |
| Number of reflections                  | 88440                                                                                            |
| Independent reflections                | 39170                                                                                            |
| R <sub>int</sub>                       | 0.0557                                                                                           |
| Fo <sup>2</sup> > 2σ(Fo) <sup>2</sup>  | 35776                                                                                            |
| Number of variables                    | 1460                                                                                             |
| R <sub>1</sub> , ωR <sub>2</sub>       | 0.1362, 0.3280                                                                                   |

**Table S2.** SHAPE analysis of the coordination polyhedra around the lanthanide<sup>III</sup> centers in **1**.

| Dy center | CShM SAPR-8<br>(square antiprism D4d) | CShM BTPR-8<br>(biaugmented trigonal<br>prism C2v) | CShM TDD-8<br>(triangular<br>dodecahedron D2d) | CShM JBTPR-8<br>(Biaugmented trigonal<br>prism J50) |
|-----------|---------------------------------------|----------------------------------------------------|------------------------------------------------|-----------------------------------------------------|
| Dy1       | 0.469                                 | 1.660                                              | 2.067                                          | 1.826                                               |
| Dy2       | 0.814                                 | 0.997                                              | 1.517                                          | 1.616                                               |
| Dy3       | 0.657                                 | 1.490                                              | 1.772                                          | 1.905                                               |

**Table S3.** Best fitted parameters ( $\chi_T$ ,  $\chi_S$ ,  $\alpha$  and  $\tau$ ) with the extended Debye model for compound **1** at 0 Oe in the temperature range 2–11 K.

| T / K | $\chi_T$ / cm <sup>3</sup> mol <sup>-1</sup> | $\chi_S$ / cm <sup>3</sup> mol <sup>-1</sup> | $\alpha$ | $\tau$ / s | R <sup>2</sup> |
|-------|----------------------------------------------|----------------------------------------------|----------|------------|----------------|
| 2     | 18.59610                                     | 2.09475                                      | 0.24499  | 1.72E-03   | 0.99921        |
| 2.2   | 17.10308                                     | 1.95451                                      | 0.24413  | 1.68E-03   | 0.99918        |
| 2.4   | 15.51728                                     | 1.78053                                      | 0.24244  | 1.61E-03   | 0.99920        |
| 2.6   | 14.28633                                     | 1.70037                                      | 0.23893  | 1.57E-03   | 0.99927        |
| 2.8   | 13.24476                                     | 1.61026                                      | 0.23494  | 1.52E-03   | 0.99924        |
| 3     | 12.34720                                     | 1.53120                                      | 0.23197  | 1.46E-03   | 0.99931        |
| 3.5   | 10.56555                                     | 1.38621                                      | 0.21864  | 1.31E-03   | 0.99935        |
| 4     | 9.23378                                      | 1.26388                                      | 0.20595  | 1.16E-03   | 0.99945        |
| 4.5   | 8.18765                                      | 1.16001                                      | 0.19374  | 1.00E-03   | 0.99956        |
| 5     | 7.36303                                      | 1.03344                                      | 0.18539  | 8.43E-04   | 0.99967        |
| 5.5   | 6.68510                                      | 0.95306                                      | 0.17632  | 7.05E-04   | 0.99972        |
| 6     | 6.12987                                      | 0.88143                                      | 0.16936  | 5.87E-04   | 0.99976        |
| 7     | 5.26015                                      | 0.74658                                      | 0.16182  | 4.00E-04   | 0.99978        |
| 8     | 4.60495                                      | 0.75950                                      | 0.15241  | 2.81E-04   | 0.99976        |
| 9     | 4.09330                                      | 0.96739                                      | 0.12445  | 2.09E-04   | 0.99989        |
| 10    | 3.68619                                      | 1.20832                                      | 0.09354  | 1.60E-04   | 0.99995        |
| 11    | 3.35144                                      | 1.40667                                      | 0.05627  | 1.20E-04   | 0.99994        |

**Table S4.** Best fitted parameters ( $\chi_{T,1}$ ,  $\chi_S$ ,  $\tau_1$ ,  $\alpha_1$ ,  $\chi_{T,2}$ ,  $\tau_2$ ,  $\chi_{T,2}$  and  $\alpha_2$ ) with the extended Debye model for compound **1** at 2 K in the field range 0–1800 Oe.

| T / K | $\chi_{T,1} / \text{cm}^3 \text{mol}^{-1}$ | $\chi_S / \text{cm}^3 \text{mol}^{-1}$ | $\tau_1 / \text{s}$ | $\alpha_1$ | $\chi_{T,2} / \text{cm}^3 \text{mol}^{-1}$ | $\alpha_2$ | $\tau_2 / \text{s}$ | R <sup>2</sup> |
|-------|--------------------------------------------|----------------------------------------|---------------------|------------|--------------------------------------------|------------|---------------------|----------------|
| 0     | 1.83E+01                                   | 2.87E+00                               | 1.85E-03            | 1.98E-01   | 0.00E+00                                   | 0.00E+00   | 1.00E+30            | 1.00E+00       |
| 200   | 7.65E+00                                   | 7.44E-01                               | 1.13E-01            | 1.79E-01   | 1.13E+01                                   | 4.19E-01   | 1.61E-03            | 1.00E+00       |
| 400   | 1.42E+01                                   | 1.54E-01                               | 6.03E-01            | 3.67E-01   | 5.03E+00                                   | 6.24E-01   | 2.51E-03            | 1.00E+00       |
| 600   | 2.02E+01                                   | 1.41E+00                               | 1.29E+00            | 4.05E-01   | —                                          | —          | —                   | 9.99E-01       |
| 800   | 1.93E+01                                   | 8.92E-01                               | 1.40E+00            | 3.74E-01   | —                                          | —          | —                   | 9.99E-01       |
| 1000  | 1.85E+01                                   | 7.75E-01                               | 1.31E+00            | 3.52E-01   | —                                          | —          | —                   | 9.99E-01       |
| 1200  | 1.77E+01                                   | 6.98E-01                               | 1.12E+00            | 3.39E-01   | —                                          | —          | —                   | 1.00E+00       |
| 1400  | 1.70E+01                                   | 6.41E-01                               | 9.53E-01            | 3.35E-01   | —                                          | —          | —                   | 1.00E+00       |
| 1600  | 1.64E+01                                   | 5.94E-01                               | 7.83E-01            | 3.33E-01   | —                                          | —          | —                   | 1.00E+00       |
| 1800  | 1.57E+01                                   | 5.53E-01                               | 6.38E-01            | 3.35E-01   | —                                          | —          | —                   | 1.00E+00       |

**Table S5.** Best fitted parameters ( $\chi_T$ ,  $\chi_S$ ,  $\alpha$  and  $\tau$ ) with the extended Debye model for compound **1** at 1 kOe in the temperature range 2–11 K.

| T / K | $\chi_T / \text{cm}^3 \text{mol}^{-1}$ | $\chi_S / \text{cm}^3 \text{mol}^{-1}$ | $\alpha$ | $\tau / \text{s}$ | R <sup>2</sup> |
|-------|----------------------------------------|----------------------------------------|----------|-------------------|----------------|
| 2     | 19.56908                               | 0.76507                                | 0.34733  | 1.30E+00          | 0.99953        |
| 2.2   | 15.68692                               | 0.73605                                | 0.28624  | 7.54E-01          | 0.99545        |
| 2.4   | 15.73208                               | 0.69447                                | 0.28913  | 4.42E-01          | 0.99941        |
| 2.6   | 14.03325                               | 0.64330                                | 0.26780  | 2.71E-01          | 0.99931        |
| 2.8   | 12.54221                               | 0.59937                                | 0.24704  | 1.72E-01          | 0.99921        |
| 3     | 11.46374                               | 0.55384                                | 0.23487  | 1.15E-01          | 0.99935        |
| 3.5   | 9.76356                                | 0.48406                                | 0.21577  | 4.80E-02          | 0.99942        |
| 4     | 8.09428                                | 0.40965                                | 0.20991  | 2.25E-02          | 0.99938        |
| 4.5   | 7.12262                                | 0.35458                                | 0.20340  | 1.23E-02          | 0.99945        |
| 5     | 6.39594                                | 0.32498                                | 0.20044  | 7.06E-03          | 0.99946        |
| 5.5   | 5.74641                                | 0.31738                                | 0.18865  | 4.29E-03          | 0.99914        |
| 6     | 5.26348                                | 0.31586                                | 0.19110  | 2.87E-03          | 0.99938        |
| 7     | 4.51831                                | 0.32971                                | 0.18457  | 1.37E-03          | 0.99946        |
| 8     | 3.95566                                | 0.42122                                | 0.17286  | 7.45E-04          | 0.99945        |
| 9     | 3.50686                                | 0.59429                                | 0.15446  | 4.43E-04          | 0.99964        |
| 10    | 3.15245                                | 0.78787                                | 0.12428  | 2.78E-04          | 0.99984        |
| 11    | 2.86285                                | 1.01489                                | 0.08767  | 1.79E-04          | 0.99992        |

## References

- Mattei, C.A.; Montigaud, V.; Gendron, F.; Denis-Quanquin, D.; Dorcet, V.; Giraud, N.; Riobé, F.; Argouarch, G.; Maury, O.; Le Guennic, B.; Cador, O.; Lalli, C.; Pointillart, F. Solid-state versus solution investigation of a luminescent chiral BINOL-derived bisphosphate single-molecule magnet. *Inorg. Chem. Front.* **2021**, *8*, 947–962.
